# Supplementary material
Source: publisher site journal article supplement (https://www.dovepress.com/article/555262)
Supplement: Supplementary file 1 [file 555262%20Revised%20Supplementary%20Material.docx]

**Supplementary Table 1.** **Subgroup analysis of median time on treatment (TOT) (N = 72)**

| **Subgroup** | **Patients, n (%)** | **Median TOT (90% CI), months** |
| --- | --- | --- |
| Baseline age | | |
| <65 years (n = 39) | 35 (89.7) | 15.9 (12.85–20.99) |
| ≥65 years (n = 33) | 29 (87.9) | 11.8 (3.61–19.15) |
| Baseline ECOG status | | |
| ≤1 (n = 66) | 58 (87.9) | 14.9 (10.18–18.63) |
| Baseline *EGFR* mutation type | | |
| Common *EGFR* mutations (exon 19 and/or L858R) (n = 59) | 51 (86.4) | 14.9 (11.99–19.15) |
| Uncommon: excluding common *EGFR* mutations (exon 19 and/or L858R) (n = 13) | 13 (100.0) | 7.5 (1.94–16.82) |
| Uncommon: excluding common *EGFR* mutations (exon 19 and/or L858R), *EGFR* exon 20 insertions and T790M mutations (n = 10) | 10 (100.0) | 10.7 (0.99–25.13) |
| Baseline starting dose | | |
| 30 mg (n = 27) | 24 (88.9) | 10.2 (4.86–20.99) |
| 40 mg (n = 45) | 40 (88.9) | 15.9 (13.31–19.15) |
| Brain metastasis | | |
| With brain metastasis (n = 12) | 12 (100.0) | 14.7 (4.86–20.99) |
| Without brain metastasis (n = 60) | 52 (86.7) | 14.4 (11.27–18.63) |

CI, confidence interval, ECOG, Eastern Cooperative Oncology Group; EGFR, epidermal growth factor receptor.

**Supplementary Table 2.** **Subgroup analysis of overall response rate (ORR) and best overall response (BOR) (N = 72)**

| **Subgroup** | **Number of patients with CR + PR** | | **Number of patients with BOR** | **ORR (95% CI), %** |
| --- | --- | --- | --- | --- |
| Baseline age | | | | |
| <65 years (n = 39) | 24 | | 38 | 63.2 (45.99–78.19) |
| ≥65 years (n = 33) | 29 | | 29 | 62.1 (42.26–9.31) |
| Baseline ECOG status | | | | |
| ≤1 (n = 66) | 38 | 61 | | 62.3 (48.96–74.39) |
| Baseline *EGFR* mutation | | | | |
| Common *EGFR* mutations (exon 19 and/or L858R) (n = 59) | 36 | | 55 | 65.5 (51.42–77.46) |
| Uncommon: excluding common *EGFR* mutations (exon 19 and/or L858R) (n = 13) | 6 | | 12 | 50.0 (21.09–78.91) |
| Uncommon: excluding common *EGFR* mutations (exon 19 and/or L858R), *EGFR* exon 20 insertions & T790M mutations (n = 10) | 5 | | 10 | 50.0 (18.71–81.29) |
| Baseline starting dose | | | | |
| 30 mg (n = 27) | 13 | | 24 | 54.2 (32.82–74.45) |
| 40 mg (n = 45) | 29 | | 43 | 67.4 (51.46–80.92) |
| Brain metastasis | | | | |
| With (n = 12) | 9 | | 12 | 75.0 (42.81–94.51) |
| Without (n=60) | 33 | | 55 | 60.0 (45.91–72.98) |

BOR, best overall response; CI, confidence interval, CR, complete response; ECOG, Eastern Cooperative Oncology Group; EGFR, epidermal growth factor receptor; PR, partial response.
